# Supplementary material
Source: bioRxiv or medRxiv preprint supplement (https://www.biorxiv.org/highwire/filestream/86146/field_highwire_adjunct_files/0/280677-1.pdf)
Supplement: Supplementary file [file 280677-1.pdf]

# Supplementary Materials

## Figures

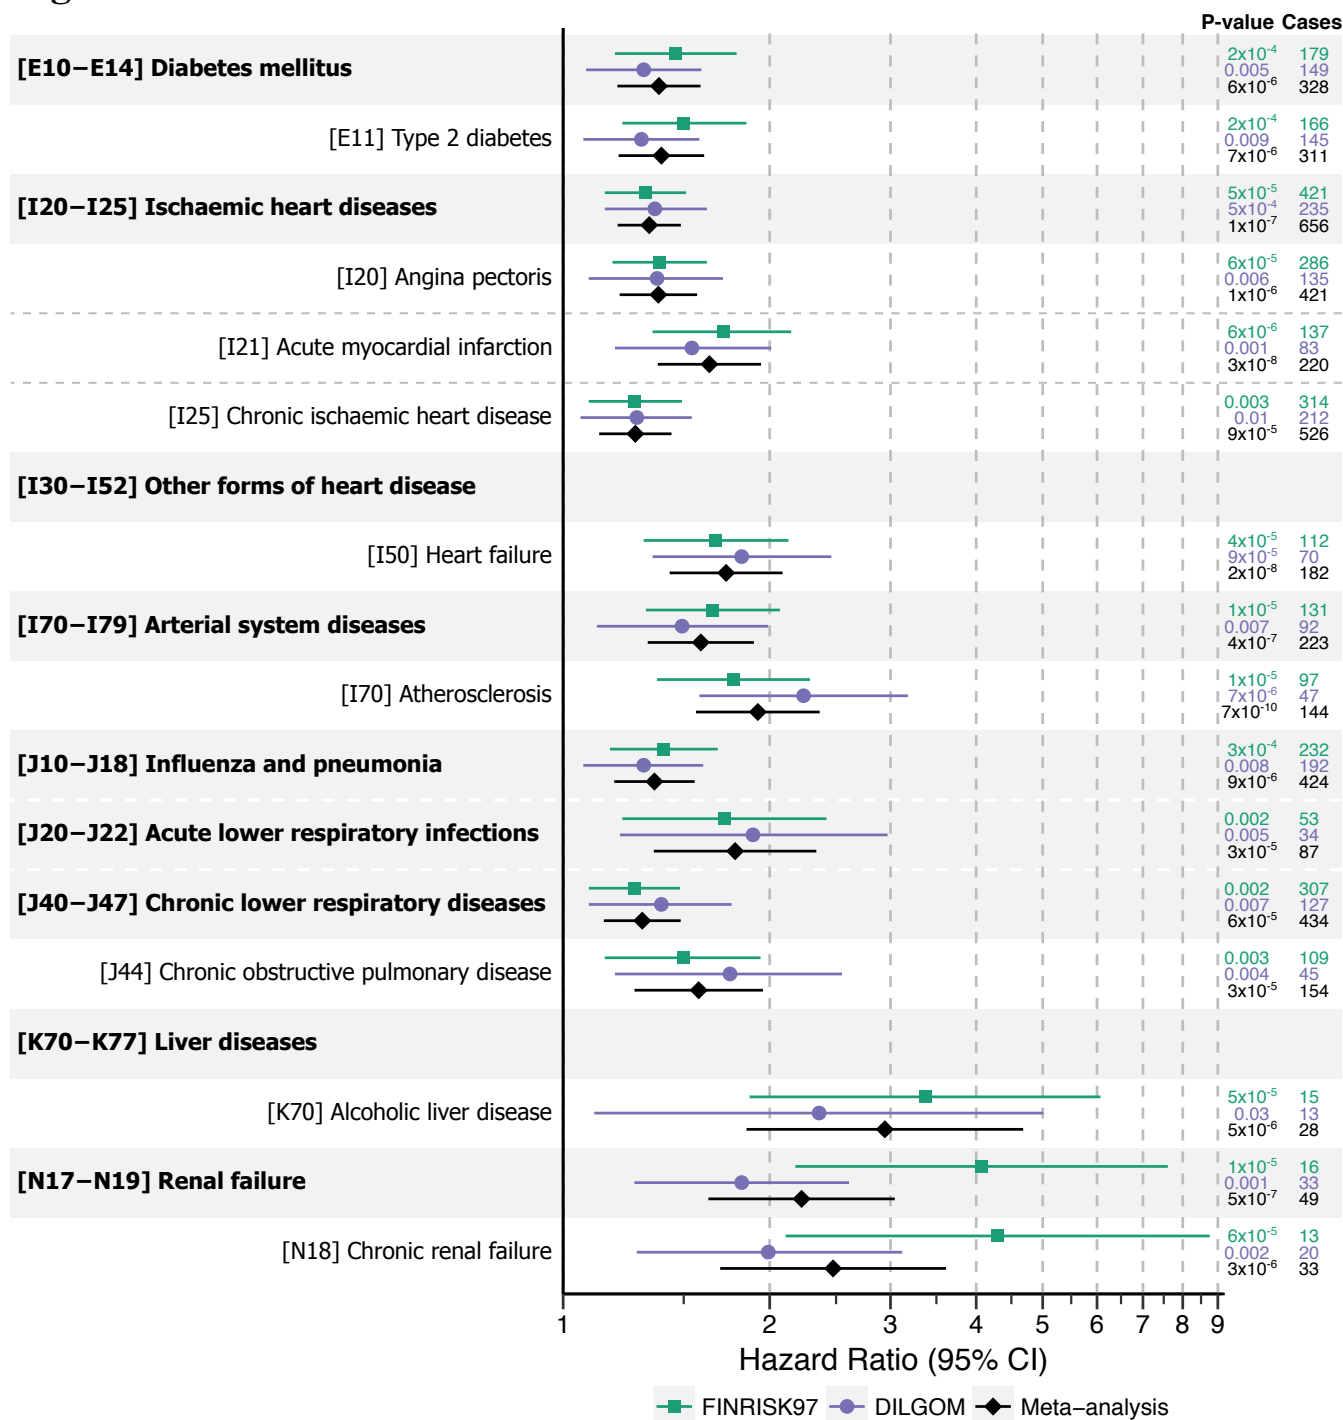

**Figure S1. Cohort specific associations between GlycA and 8-year disease risk.** Hazard ratios (diamonds) and 95% confidence intervals for the first diagnosis occurrence (hospitalisation or mortality) conferred per standard deviation increase of GlycA in FINRISK97 (green), DILGOM (blue), and in meta-analysis (black). The figure shows all ICD categories and codes where the association GlycA was

nominally significant ( $P < 0.05$ ) and the association in meta-analysis was significant after multiple testing correction ( $P < 1.1 \times 10^{-4}$ ; adjusting for the 468 tested outcomes). HRs and 95% CIs are shown on a natural logarithm scale. Diagnosis data were analysed for 468 outcomes with  $> 10$  events in both cohorts over a matched 8-year follow-up period. Alphanumeric codes in the square brackets indicate the ICD10 codes/categories for each outcome. Cox models were fit using age as the time scale and adjusting for sex, smoking status, BMI, blood pressure, alcohol consumption, and biomarkers for all-cause mortality identified alongside GlycA: citrate, albumin, and VLDL particle size. Prevalent cases were excluded for each association test (**Methods**).

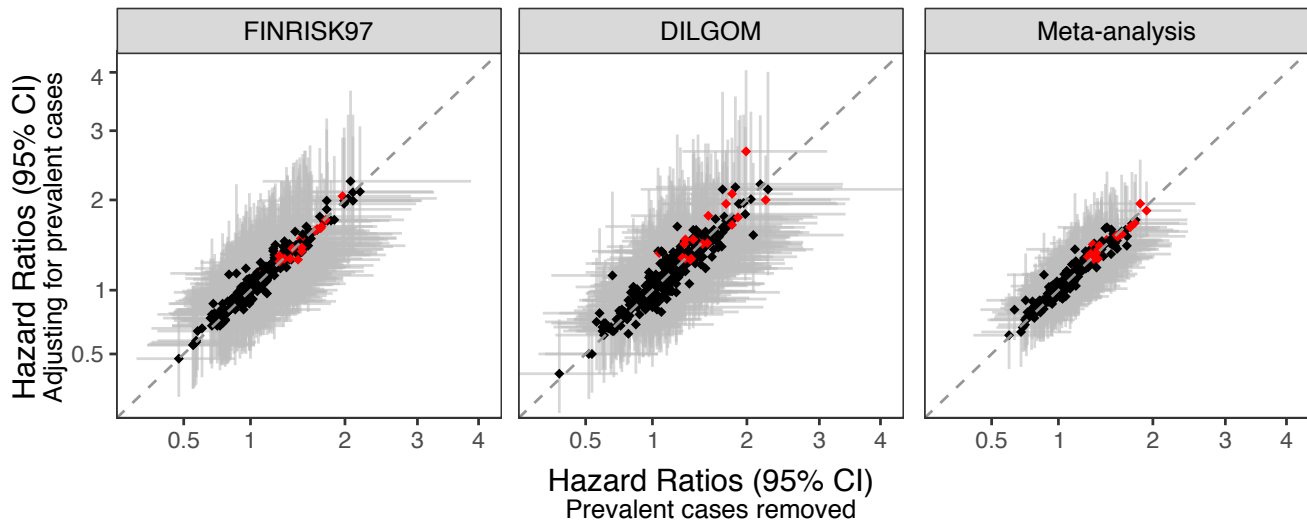

**Figure S2. Sensitivity analysis to prevalent disease.** Each panel compares the hazard ratios (diamonds) calculated excluding prevalent cases (x-axes) to hazard ratios calculated when adjusting for prevalent cases as a covariate (y-axes) in DILGOM, FINRISK97, and meta-analysis. Horizontal and vertical grey bars indicate the 95% confidence intervals for each outcome excluding prevalent cases (horizontal bars, x-axes) and adjusting for prevalent cases (vertical grey bars, y-axes) respectively. The diagonal dashed line shows  $y=x$ , the location where hazard ratios would fall if their estimates were identical in both models. Data are shown on a square root scale. Red diamonds indicate the significantly associated outcomes shown in **Figure 1** and **Figure S1**. Diamonds above the dashed diagonal line and  $> 1$  indicate hazard ratios which are stronger in the model in which prevalent cases are adjusted. Cox proportional hazard models adjusted for prevalent cases were only analysed for  $> 20$  incident cases ( $N=356$  electronic health records in both DILGOM and FINRISK97) as the statistical models became unstable with lower number of incident cases adjusted for prevalent disease. Adjustment for prevalent cases was performed where there were  $> 10$  cases of the respective electronic health records in the 10 years prior to sample collection.

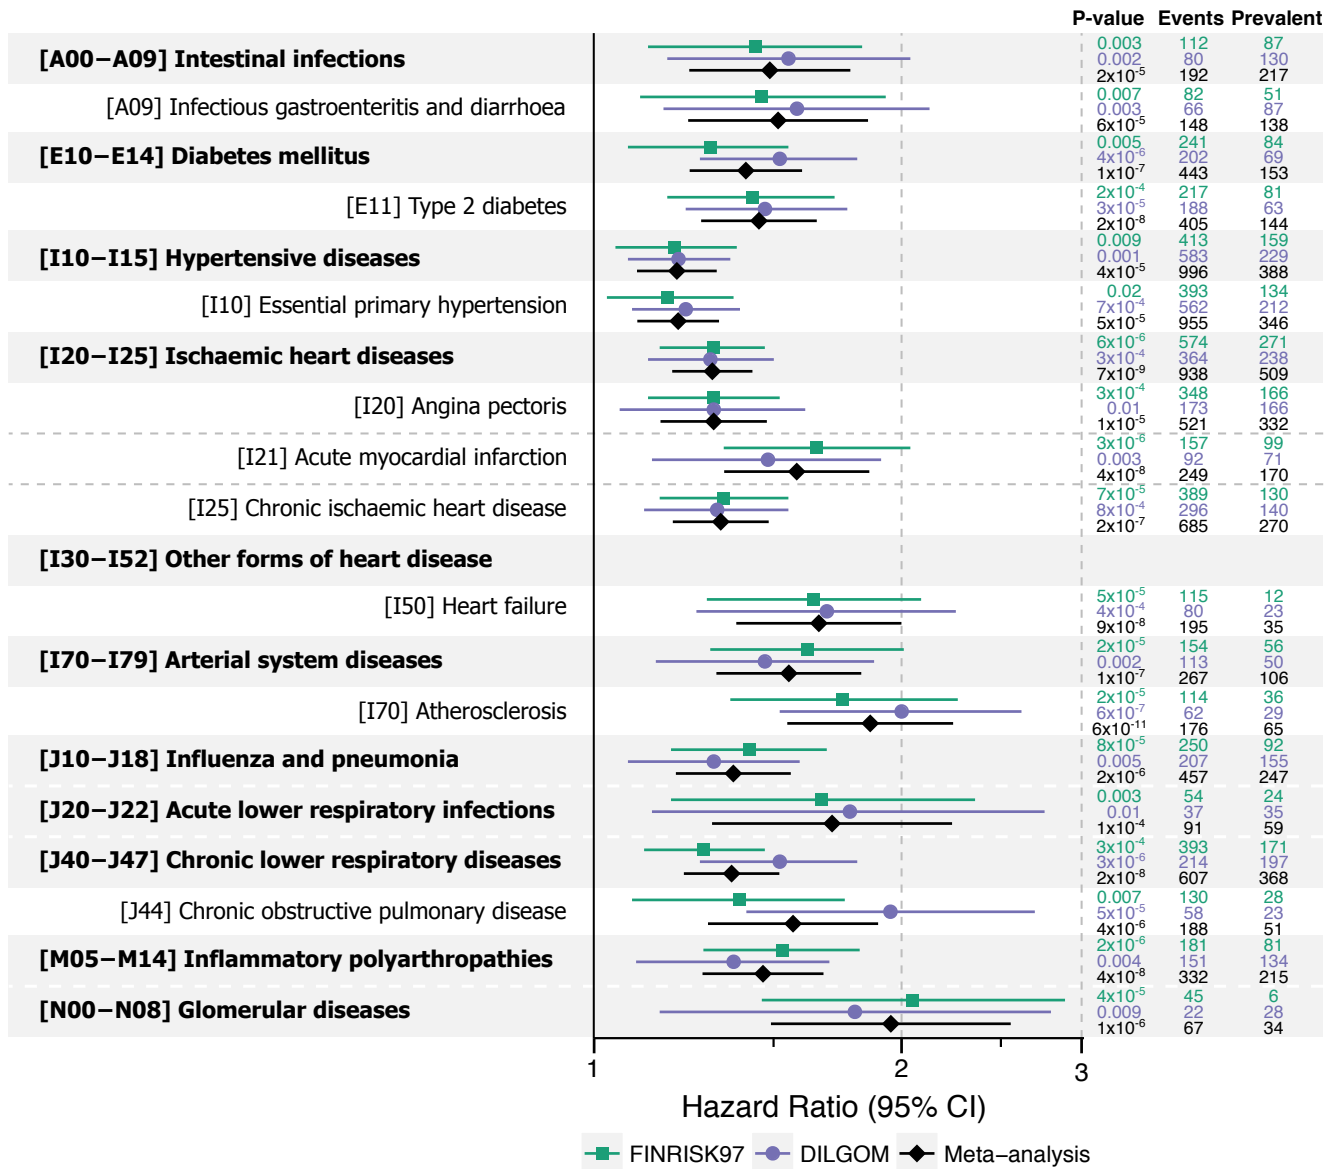

**Figure S3. 8-year disease risk for GlycA and when adjusting for prevalent cases.** Cox proportional hazard ratios (diamonds) and 95% confidence intervals for the first diagnosis occurrence (hospitalisation or mortality) conferred per standard deviation increase of GlycA in FINRISK97, DILGOM, and in meta-analysis. Diagnosis data were analysed for 356 outcomes with > 20 events in both cohorts over a matched 8-year follow-up period and adjustment for prevalent cases was performed where there were > 10 prevalent cases. The figure shows all ICD categories and codes where the association GlycA was nominally significant ( $P < 0.05$ ) and the association in meta-analysis was significant after multiple testing correction ( $P < 1.2 \times 10^{-4}$ ; adjusting for the 356 tested outcomes). HRs and 95% CIs are shown on a natural logarithm scale. Alphanumeric codes in the square brackets indicate the ICD10 codes/categories for each outcome. Models were fit using age as the time scale and adjusting for sex, smoking status, BMI, blood pressure, alcohol consumption, biomarkers for all-cause mortality identified alongside GlycA (citrate, albumin, and VLDL particle size), and prevalent cases of the outcome within 10 years prior to sample collection. Hazard ratios are detailed in **Table S3**.

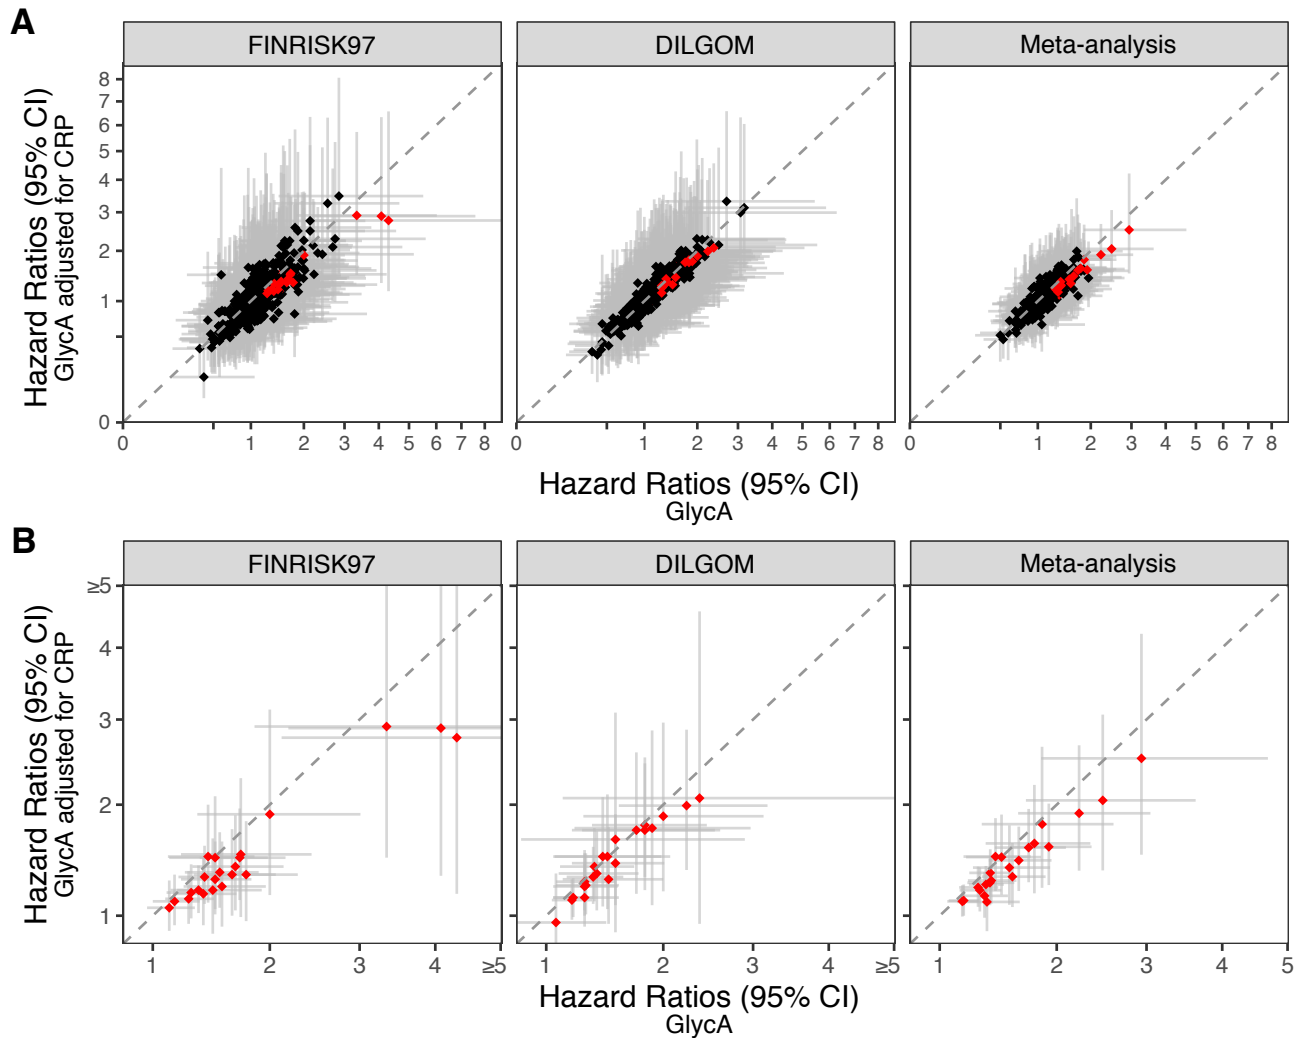

**Figure S4. Sensitivity analysis to C-reactive protein.** Each plot compares the hazard ratios (diamonds) conferred per standard deviation increase of GlycA (x-axes) to hazard ratios conferred per standard deviation increase of GlycA when adjusting for CRP (y-axes) in DILGOM, FINRISK97, and meta-analysis. Horizontal and vertical grey bars indicate the 95% confidence intervals for each hazard ratio for GlycA (horizontal bars, x-axes) and for GlycA adjusted for CRP (vertical grey bars, y-axes) respectively. The diagonal dashed line shows  $y=x$ , the location where hazard ratios would fall if their estimates were identical in both models. Diamonds above the dashed diagonal line and  $> 1$  indicate hazard ratios which are stronger after adjusting GlycA for CRP. Data are shown on a square root scale. Red diamonds indicate the significantly associated outcomes shown in **Figure 1** and **Figure S1**. Panel **A**) shows all EHRs while **B**) shows just the significant outcomes. 95% confidence intervals in **B**) with a lower limit  $\leq 0.8$  or an upper limit  $\geq 5$  are truncated. Models were fit using age as the time scale and adjusting for sex, smoking status, BMI, blood pressure, alcohol consumption and biomarkers for all-cause mortality identified alongside GlycA: citrate, albumin, and VLDL particle size. Prevalent cases within 10 years prior to sample collection were excluded for each association test.

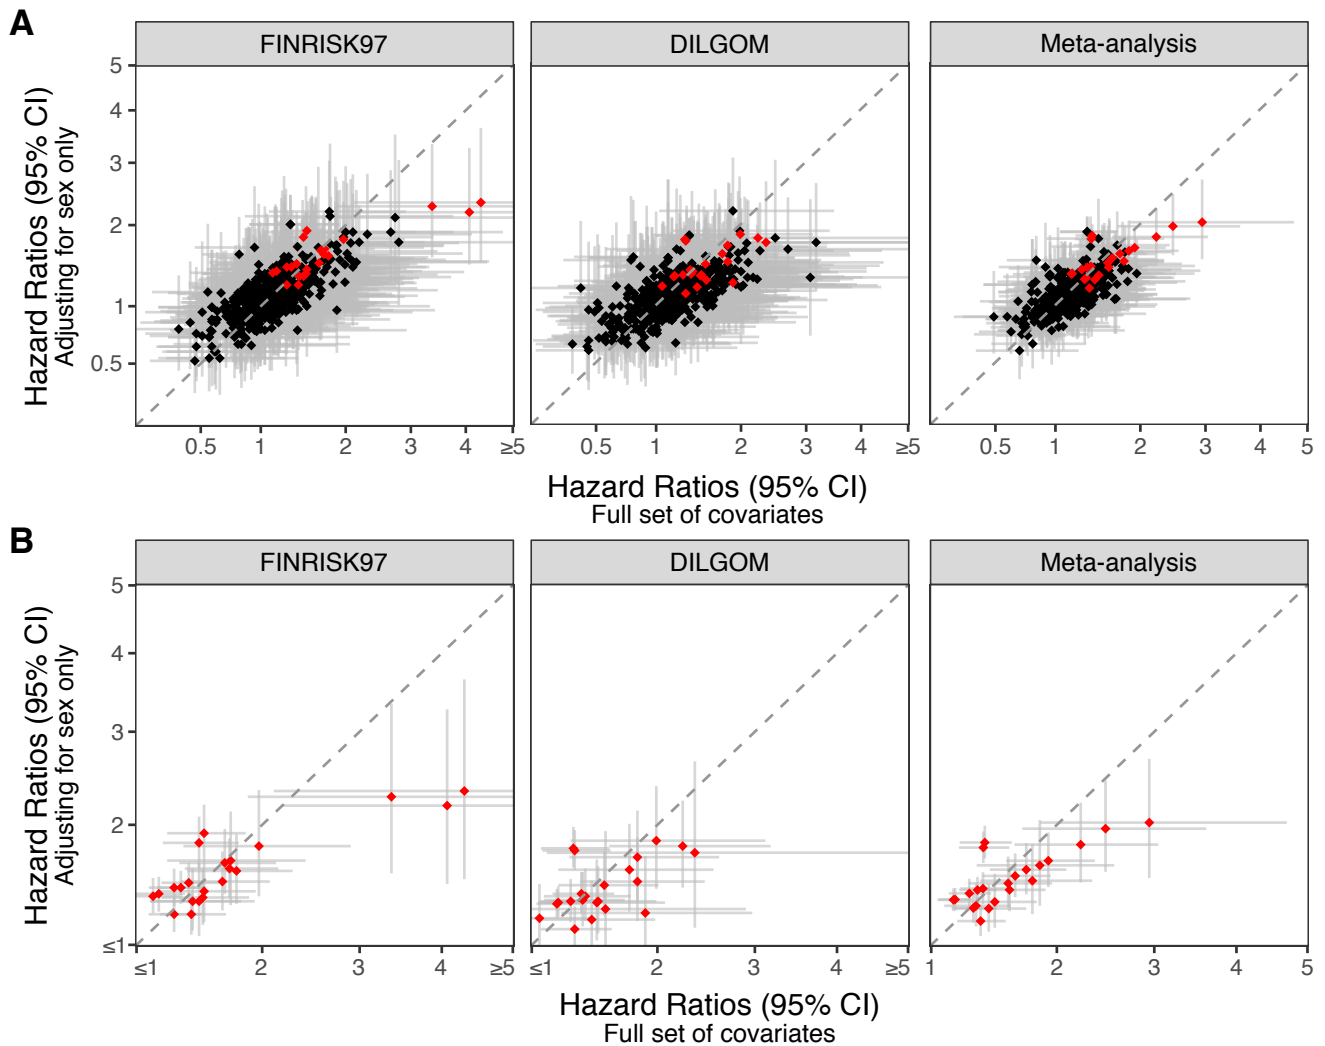

**Figure S5. Sensitivity analysis to models with minimal adjustment.** Each panel compares the hazard ratios (diamonds) conferred per standard deviation increase of GlycA adjusting for the full set of covariates (x-axes) to hazard ratios conferred per standard deviation increase of GlycA when adjusting for sex only (y-axes) in DILGOM, FINRISK97, and meta-analysis. The full set of covariates used in Cox proportional hazards models shown on the x-axis were sex, smoking status, BMI, blood pressure, alcohol consumption and biomarkers for all-cause mortality identified alongside GlycA: citrate, albumin, and VLDL particle size. In both models age was used as the time-scale and prevalent cases within 10 years prior to sample collection were excluded for each association test. Horizontal and vertical grey bars indicate the 95% confidence intervals for each hazard ratio for GlycA when adjusting for the full set of covariates (horizontal bars, x-axes) and for GlycA adjusting for sex only (vertical grey bars, y-axes) respectively. The diagonal dashed line shows  $y=x$ , the location where hazard ratios would fall if their estimates were identical in both models. Data are shown on a square root scale. Red diamonds indicate the significantly associated outcomes shown in **Figure 1** and **Figure S1**. Panel **A**) shows all EHRs while **B**) shows just the significant outcomes. 95% confidence intervals in **A**) with an upper limit  $\geq 5$  are truncated. 95% confidence intervals in **B**) with a lower limit  $\leq 1$  or an upper limit  $\geq 5$  are truncated.

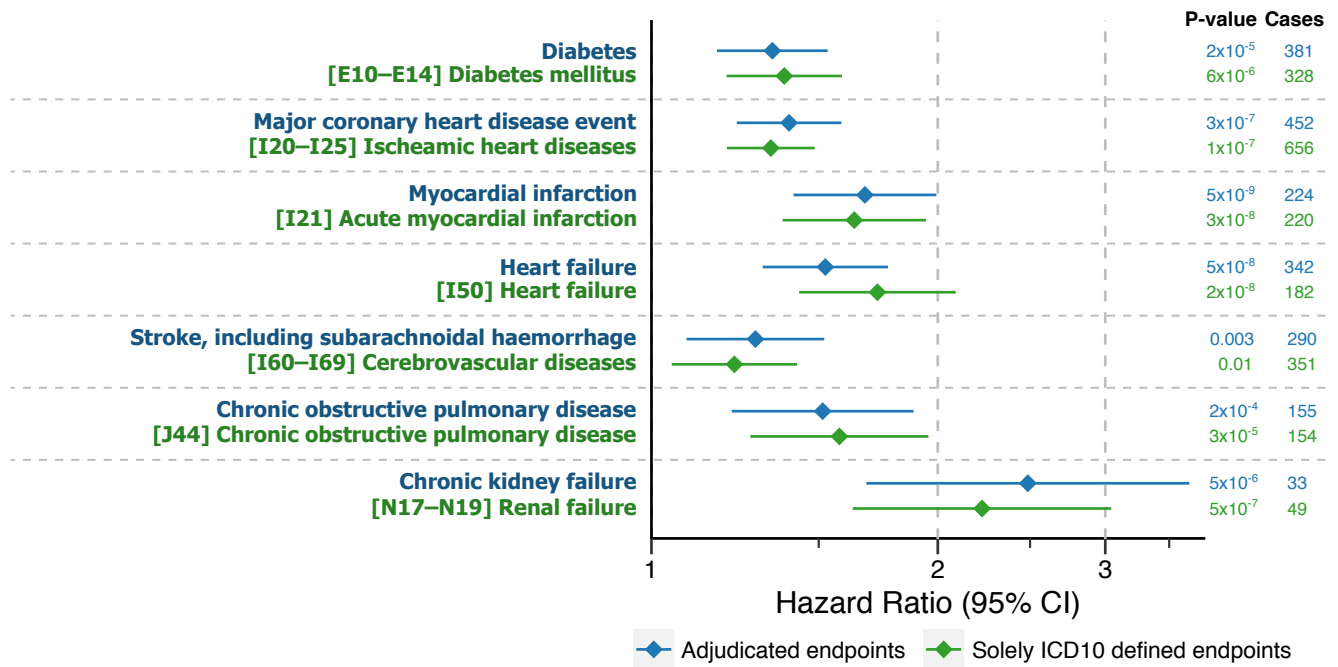

**Figure S6. Sensitivity analysis using broader registry information for major common diseases.** Cox proportional hazard ratios (diamonds) and 95% confidence intervals for the first diagnosis occurrence (**Methods**) conferred per standard deviation increase of GlycA in meta-analysis of FINRISK97 and DILGOM. The figure shows selected major common diseases from the broader registry information compared to their closest equivalent outcome (ICD10 code or category) in the EHR scan. Models were fit using age as the time scale and adjusting for sex, smoking status, BMI, blood pressure, alcohol consumption, and biomarkers for all-cause mortality identified alongside GlycA: citrate, albumin, and VLDL particle size. Prevalent cases detected using the same registry information were excluded from the analysis. Hazard ratios for the adjudicated endpoint definitions are detailed in **Table S4**.

## **Tables**

**Table S1. Listing of outcomes analysed for an association with GlycA.** NB this table is provided as a separate Excel file.



**Table S2: Electronic health record associations between GlycA and 8-year disease risk.** Details of the Cox proportional hazard models shown in **Figure 1** and **Figure S1**. Models were fit with age as time scale, adjusting for sex, smoking status, BMI, blood pressure, alcohol consumption, and biomarkers for all-cause mortality identified alongside GlycA: citrate, albumin, and VLDL particle size. Diagnosis data was obtained from a matched 8-year follow-up period of the DILGOM and FINRISK97 cohorts. Prevalent cases within 10 years prior to sample collection were excluded from association tests between GlycA and each outcome. Alphanumeric codes within the square brackets indicate the ICD10 categories or codes for each outcome. Meta-analysis results were obtained from an inverse variance weighted fixed effects meta-analysis of the DILGOM and FINRISK97 cohorts. HR: the hazard ratio conferred per standard deviation increase of GlycA levels. SE: standard error of the hazard ratio estimate. 95% CI: 95% confidence interval of the hazard ratio.

| Outcome                                      | Cohort        | Events | HR   | SE   | 95% CI    | P-value             |
|----------------------------------------------|---------------|--------|------|------|-----------|---------------------|
| [E10–E14] Diabetes mellitus                  | Meta-analysis | 328    | 1.38 | 0.07 | 1.20–1.59 | $6 \times 10^{-6}$  |
|                                              | DILGOM        | 149    | 1.31 | 0.10 | 1.08–1.59 | 0.005               |
|                                              | FINRISK97     | 179    | 1.46 | 0.10 | 1.19–1.79 | $2 \times 10^{-4}$  |
| [E11] Type 2 diabetes                        | Meta-analysis | 311    | 1.39 | 0.07 | 1.20–1.61 | $7 \times 10^{-6}$  |
|                                              | DILGOM        | 145    | 1.30 | 0.10 | 1.07–1.58 | 0.009               |
|                                              | FINRISK97     | 166    | 1.50 | 0.11 | 1.22–1.85 | $2 \times 10^{-4}$  |
| [I20–I25] Ischaemic heart diseases           | Meta-analysis | 656    | 1.34 | 0.05 | 1.20–1.48 | $1 \times 10^{-7}$  |
|                                              | DILGOM        | 235    | 1.36 | 0.09 | 1.15–1.62 | $5 \times 10^{-4}$  |
|                                              | FINRISK97     | 421    | 1.32 | 0.07 | 1.15–1.51 | $5 \times 10^{-5}$  |
| [I20] Angina pectoris                        | Meta-analysis | 421    | 1.38 | 0.07 | 1.21–1.57 | $1 \times 10^{-6}$  |
|                                              | DILGOM        | 135    | 1.37 | 0.11 | 1.09–1.71 | 0.006               |
|                                              | FINRISK97     | 286    | 1.38 | 0.08 | 1.18–1.62 | $6 \times 10^{-5}$  |
| [I21] Acute myocardial infarction            | Meta-analysis | 220    | 1.63 | 0.09 | 1.37–1.94 | $3 \times 10^{-8}$  |
|                                              | DILGOM        | 83     | 1.54 | 0.13 | 1.19–2.01 | 0.001               |
|                                              | FINRISK97     | 137    | 1.71 | 0.12 | 1.35–2.15 | $6 \times 10^{-6}$  |
| [I25] Chronic ischaemic heart disease        | Meta-analysis | 526    | 1.27 | 0.06 | 1.13–1.44 | $9 \times 10^{-5}$  |
|                                              | DILGOM        | 212    | 1.28 | 0.10 | 1.06–1.54 | 0.01                |
|                                              | FINRISK97     | 314    | 1.27 | 0.08 | 1.09–1.49 | 0.003               |
| [I50] Heart failure                          | Meta-analysis | 182    | 1.73 | 0.10 | 1.43–2.09 | $2 \times 10^{-8}$  |
|                                              | DILGOM        | 70     | 1.82 | 0.15 | 1.35–2.46 | $9 \times 10^{-5}$  |
|                                              | FINRISK97     | 112    | 1.67 | 0.12 | 1.31–2.13 | $4 \times 10^{-5}$  |
| [I70–I79] Arterial system diseases           | Meta-analysis | 223    | 1.59 | 0.09 | 1.33–1.90 | $4 \times 10^{-7}$  |
|                                              | DILGOM        | 92     | 1.49 | 0.15 | 1.12–1.99 | 0.007               |
|                                              | FINRISK97     | 131    | 1.65 | 0.12 | 1.32–2.07 | $1 \times 10^{-5}$  |
| [I70] Atherosclerosis                        | Meta-analysis | 144    | 1.92 | 0.11 | 1.56–2.37 | $7 \times 10^{-10}$ |
|                                              | DILGOM        | 47     | 2.24 | 0.18 | 1.58–3.18 | $7 \times 10^{-6}$  |
|                                              | FINRISK97     | 97     | 1.77 | 0.13 | 1.37–2.29 | $1 \times 10^{-5}$  |
| [J10–J18] Influenza and pneumonia            | Meta-analysis | 424    | 1.36 | 0.07 | 1.19–1.55 | $9 \times 10^{-6}$  |
|                                              | DILGOM        | 192    | 1.31 | 0.10 | 1.07–1.60 | 0.008               |
|                                              | FINRISK97     | 232    | 1.40 | 0.09 | 1.17–1.68 | $3 \times 10^{-4}$  |
| [J20–J22] Acute lower respiratory infections | Meta-analysis | 87     | 1.78 | 0.14 | 1.36–2.34 | $3 \times 10^{-5}$  |
|                                              | DILGOM        | 34     | 1.89 | 0.23 | 1.21–2.97 | 0.005               |
|                                              | FINRISK97     | 53     | 1.72 | 0.18 | 1.22–2.42 | 0.002               |
| [J40–J47] Chronic lower respiratory diseases | Meta-analysis | 434    | 1.30 | 0.07 | 1.15–1.48 | $6 \times 10^{-5}$  |
|                                              | DILGOM        | 127    | 1.39 | 0.12 | 1.09–1.76 | 0.007               |
|                                              | FINRISK97     | 307    | 1.27 | 0.08 | 1.09–1.48 | 0.002               |

| <b>Outcome</b>                              | <b>Cohort</b> | <b>Events</b> | <b>HR</b> | <b>SE</b> | <b>95% CI</b> | <b>P-value</b>     |
|---------------------------------------------|---------------|---------------|-----------|-----------|---------------|--------------------|
| [J44] Chronic obstructive pulmonary disease | Meta-analysis | 154           | 1.58      | 0.11      | 1.27–1.96     | $3 \times 10^{-5}$ |
|                                             | DILGOM        | 45            | 1.75      | 0.19      | 1.19–2.55     | 0.004              |
|                                             | FINRISK97     | 109           | 1.50      | 0.13      | 1.15–1.94     | 0.003              |
| [K70] Alcoholic liver disease               | Meta-analysis | 28            | 2.94      | 0.24      | 1.85–4.68     | $5 \times 10^{-6}$ |
|                                             | DILGOM        | 13            | 2.36      | 0.38      | 1.11–5.01     | 0.03               |
|                                             | FINRISK97     | 15            | 3.37      | 0.30      | 1.87–6.07     | $5 \times 10^{-5}$ |
| [N17–N19] Renal failure                     | Meta-analysis | 49            | 2.23      | 0.16      | 1.63–3.04     | $5 \times 10^{-7}$ |
|                                             | DILGOM        | 33            | 1.82      | 0.18      | 1.27–2.61     | 0.001              |
|                                             | FINRISK97     | 16            | 4.07      | 0.32      | 2.18–7.61     | $1 \times 10^{-5}$ |
| [N18] Chronic renal failure                 | Meta-analysis | 33            | 2.47      | 0.19      | 1.69–3.61     | $3 \times 10^{-6}$ |
|                                             | DILGOM        | 20            | 1.99      | 0.23      | 1.28–3.12     | 0.002              |
|                                             | FINRISK97     | 13            | 4.30      | 0.36      | 2.11–8.76     | $6 \times 10^{-5}$ |

**Table S3. Hazard ratio details for GlycA associations and when adjusting for prevalent cases.** Details of the Cox proportional hazard models shown in **Figure S3**. Models were fit with age as time scale, adjusting for sex, smoking status, BMI, blood pressure, alcohol consumption, biomarkers for all-cause mortality identified alongside GlycA (citrate, albumin, and VLDL particle size), and prevalent cases of the outcome within 10 years prior to sample collection. Diagnosis data were analysed for 356 outcomes with > 20 events in both cohorts over a matched 8-year follow-up period and adjustment for prevalent cases was performed where there were > 10 prevalent cases. Alphanumeric codes within the square brackets indicate the ICD10 categories or codes for each outcome. Meta-analysis results were obtained from an inverse variance weighted fixed effects meta-analysis of the DILGOM and FINRISK97 cohorts. #E: the number of people who were hospitalised or died from the outcome within the 8-year follow-up period. #P: the number of people who had been hospitalised from that outcome in the 10 years prior to sample collection. HR: the hazard ratio conferred per standard deviation increase of GlycA levels. SE: standard error of the hazard ratio estimate. 95% CI: 95% confidence interval of the hazard ratio.

| Outcome                                        | Cohort        | #E  | #P  | HR   | SE   | 95% CI    | P-value            |
|------------------------------------------------|---------------|-----|-----|------|------|-----------|--------------------|
| [A00-A09] Intestinal infections                | Meta-analysis | 192 | 217 | 1.49 | 0.09 | 1.24–1.78 | $2 \times 10^{-5}$ |
|                                                | DILGOM        | 80  | 130 | 1.55 | 0.14 | 1.18–2.04 | 0.002              |
|                                                | FINRISK97     | 112 | 87  | 1.44 | 0.12 | 1.13–1.83 | 0.003              |
| [A09] Infectious gastroenteritis and diarrhoea | Meta-analysis | 148 | 138 | 1.51 | 0.10 | 1.24–1.85 | $6 \times 10^{-5}$ |
|                                                | DILGOM        | 66  | 87  | 1.58 | 0.15 | 1.17–2.13 | 0.003              |
|                                                | FINRISK97     | 82  | 51  | 1.46 | 0.14 | 1.11–1.93 | 0.007              |
| [E10-E14] Diabetes mellitus                    | Meta-analysis | 443 | 153 | 1.41 | 0.06 | 1.24–1.60 | $1 \times 10^{-7}$ |
|                                                | DILGOM        | 202 | 69  | 1.52 | 0.09 | 1.27–1.81 | $4 \times 10^{-6}$ |
|                                                | FINRISK97     | 241 | 84  | 1.3  | 0.09 | 1.08–1.55 | 0.005              |
| [E11] Type 2 diabetes                          | Meta-analysis | 405 | 144 | 1.45 | 0.07 | 1.27–1.65 | $2 \times 10^{-8}$ |
|                                                | DILGOM        | 188 | 63  | 1.47 | 0.09 | 1.23–1.77 | $3 \times 10^{-5}$ |
|                                                | FINRISK97     | 217 | 81  | 1.43 | 0.10 | 1.18–1.72 | $2 \times 10^{-4}$ |
| [I10-I15] Hypertensive diseases                | Meta-analysis | 996 | 388 | 1.21 | 0.05 | 1.10–1.32 | $4 \times 10^{-5}$ |
|                                                | DILGOM        | 583 | 229 | 1.21 | 0.06 | 1.08–1.36 | 0.001              |
|                                                | FINRISK97     | 413 | 159 | 1.2  | 0.07 | 1.05–1.38 | 0.009              |
| [I10] Essential primary hypertension           | Meta-analysis | 955 | 346 | 1.21 | 0.05 | 1.10–1.33 | $5 \times 10^{-5}$ |
|                                                | DILGOM        | 562 | 212 | 1.23 | 0.06 | 1.09–1.39 | $7 \times 10^{-4}$ |
|                                                | FINRISK97     | 393 | 134 | 1.18 | 0.07 | 1.03–1.37 | 0.02               |
| [I20-I25] Ischaemic heart diseases             | Meta-analysis | 938 | 509 | 1.31 | 0.05 | 1.19–1.43 | $7 \times 10^{-9}$ |
|                                                | DILGOM        | 364 | 238 | 1.3  | 0.07 | 1.13–1.50 | $3 \times 10^{-4}$ |
|                                                | FINRISK97     | 574 | 271 | 1.31 | 0.06 | 1.16–1.47 | $6 \times 10^{-6}$ |
| [I20] Angina pectoris                          | Meta-analysis | 521 | 332 | 1.31 | 0.06 | 1.16–1.48 | $1 \times 10^{-5}$ |
|                                                | DILGOM        | 173 | 166 | 1.31 | 0.11 | 1.06–1.61 | 0.01               |
|                                                | FINRISK97     | 348 | 166 | 1.31 | 0.07 | 1.13–1.52 | $3 \times 10^{-4}$ |
| [I21] Acute myocardial infarction              | Meta-analysis | 249 | 170 | 1.58 | 0.08 | 1.34–1.86 | $4 \times 10^{-8}$ |
|                                                | DILGOM        | 92  | 71  | 1.48 | 0.13 | 1.14–1.91 | 0.003              |
|                                                | FINRISK97     | 157 | 99  | 1.65 | 0.11 | 1.34–2.04 | $3 \times 10^{-6}$ |
| [I25] Chronic ischaemic heart disease          | Meta-analysis | 685 | 270 | 1.33 | 0.06 | 1.19–1.48 | $2 \times 10^{-7}$ |
|                                                | DILGOM        | 296 | 140 | 1.32 | 0.08 | 1.12–1.55 | $8 \times 10^{-4}$ |
|                                                | FINRISK97     | 389 | 130 | 1.34 | 0.07 | 1.16–1.55 | $7 \times 10^{-5}$ |
| [I50] Heart failure                            | Meta-analysis | 195 | 35  | 1.66 | 0.09 | 1.38–2.00 | $9 \times 10^{-8}$ |
|                                                | DILGOM        | 80  | 23  | 1.69 | 0.15 | 1.26–2.26 | $4 \times 10^{-4}$ |
|                                                | FINRISK97     | 115 | 12  | 1.64 | 0.12 | 1.29–2.09 | $5 \times 10^{-5}$ |

| <b>Outcome</b>                               | <b>Cohort</b> | <b>#E</b> | <b>#P</b> | <b>HR</b> | <b>SE</b> | <b>95% CI</b> | <b>P-value</b>      |
|----------------------------------------------|---------------|-----------|-----------|-----------|-----------|---------------|---------------------|
| [I70-I79] Arterial system diseases           | Meta-analysis | 267       | 106       | 1.55      | 0.08      | 1.32–1.83     | 1×10 <sup>-7</sup>  |
|                                              | DILGOM        | 113       | 50        | 1.47      | 0.12      | 1.15–1.88     | 0.002               |
|                                              | FINRISK97     | 154       | 56        | 1.62      | 0.11      | 1.30–2.01     | 2×10 <sup>-5</sup>  |
| [I70] Atherosclerosis                        | Meta-analysis | 176       | 65        | 1.86      | 0.10      | 1.55–2.25     | 6×10 <sup>-11</sup> |
|                                              | DILGOM        | 62        | 29        | 2         | 0.14      | 1.52–2.62     | 6×10 <sup>-7</sup>  |
|                                              | FINRISK97     | 114       | 36        | 1.75      | 0.13      | 1.36–2.27     | 2×10 <sup>-5</sup>  |
| [J10-J18] Influenza and pneumonia            | Meta-analysis | 457       | 247       | 1.37      | 0.07      | 1.20–1.56     | 2×10 <sup>-6</sup>  |
|                                              | DILGOM        | 207       | 155       | 1.31      | 0.10      | 1.08–1.59     | 0.005               |
|                                              | FINRISK97     | 250       | 92        | 1.42      | 0.09      | 1.19–1.69     | 8×10 <sup>-5</sup>  |
| [J20-J22] Acute lower respiratory infections | Meta-analysis | 91        | 59        | 1.71      | 0.14      | 1.31–2.24     | 1×10 <sup>-4</sup>  |
|                                              | DILGOM        | 37        | 35        | 1.78      | 0.23      | 1.14–2.76     | 0.01                |
|                                              | FINRISK97     | 54        | 24        | 1.67      | 0.17      | 1.19–2.36     | 0.003               |
| [J40-J47] Chronic lower respiratory diseases | Meta-analysis | 607       | 368       | 1.36      | 0.05      | 1.22–1.52     | 2×10 <sup>-8</sup>  |
|                                              | DILGOM        | 214       | 197       | 1.52      | 0.09      | 1.27–1.81     | 3×10 <sup>-6</sup>  |
|                                              | FINRISK97     | 393       | 171       | 1.28      | 0.07      | 1.12–1.47     | 3×10 <sup>-4</sup>  |
| [J44] Chronic obstructive pulmonary disease  | Meta-analysis | 188       | 51        | 1.57      | 0.10      | 1.29–1.90     | 4×10 <sup>-6</sup>  |
|                                              | DILGOM        | 58        | 23        | 1.95      | 0.16      | 1.41–2.70     | 5×10 <sup>-5</sup>  |
|                                              | FINRISK97     | 130       | 28        | 1.39      | 0.12      | 1.09–1.76     | 0.007               |
| [M05-M14] Inflammatory polyarthropathies     | Meta-analysis | 332       | 215       | 1.46      | 0.07      | 1.28–1.68     | 4×10 <sup>-8</sup>  |
|                                              | DILGOM        | 151       | 134       | 1.37      | 0.11      | 1.10–1.70     | 0.004               |
|                                              | FINRISK97     | 181       | 81        | 1.53      | 0.09      | 1.28–1.82     | 2×10 <sup>-6</sup>  |
| [N00-N08] Glomerular diseases                | Meta-analysis | 67        | 34        | 1.95      | 0.14      | 1.49–2.56     | 1×10 <sup>-6</sup>  |
|                                              | DILGOM        | 22        | 28        | 1.8       | 0.22      | 1.16–2.80     | 0.009               |
|                                              | FINRISK97     | 45        | 6         | 2.05      | 0.17      | 1.46–2.89     | 4×10 <sup>-5</sup>  |

**Table S4. Hazard ratio details for GlycA associations with major common diseases** using more detailed registry information. Details of the Cox proportional hazard models shown in **Figure S6**. Models were fit with age as time scale, adjusting for sex, smoking status, BMI, blood pressure, alcohol consumption, and biomarkers for all-cause mortality identified alongside GlycA: citrate, albumin, and VLDL particle size. Prevalent cases were removed from the analysis. HR: the hazard ratio conferred per standard deviation increase of GlycA levels. SE: standard error of the hazard ratio estimate. 95% CI: 95% confidence interval of the hazard ratio.

| <b>Outcome</b>                               | <b>Cohort</b> | <b>#E</b> | <b>HR</b> | <b>SE</b> | <b>95% CI</b> | <b>P-value</b>     |
|----------------------------------------------|---------------|-----------|-----------|-----------|---------------|--------------------|
| Diabetes                                     | FINRISK97     | 237       | 1.38      | 0.10      | 1.14–1.67     | $8 \times 10^{-4}$ |
|                                              | DILGOM        | 144       | 1.30      | 0.10      | 1.07–1.57     | 0.008              |
|                                              | Meta-analysis | 381       | 1.34      | 0.07      | 1.17–1.53     | $2 \times 10^{-5}$ |
| Major coronary heart disease event           | FINRISK97     | 277       | 1.46      | 0.08      | 1.24–1.73     | $7 \times 10^{-6}$ |
|                                              | DILGOM        | 175       | 1.31      | 0.10      | 1.08–1.59     | 0.007              |
|                                              | Meta-analysis | 452       | 1.4       | 0.06      | 1.23–1.58     | $3 \times 10^{-7}$ |
| Myocardial infarction                        | FINRISK97     | 140       | 1.79      | 0.12      | 1.43–2.26     | $6 \times 10^{-7}$ |
|                                              | DILGOM        | 84        | 1.54      | 0.13      | 1.18–2.00     | 0.001              |
|                                              | Meta-analysis | 224       | 1.68      | 0.09      | 1.41–1.99     | $5 \times 10^{-9}$ |
| Heart failure                                | FINRISK97     | 242       | 1.56      | 0.09      | 1.30–1.86     | $1 \times 10^{-6}$ |
|                                              | DILGOM        | 100       | 1.43      | 0.15      | 1.07–1.91     | 0.02               |
|                                              | Meta-analysis | 342       | 1.52      | 0.08      | 1.31–1.77     | $5 \times 10^{-8}$ |
| Stroke, including subarachnoidal haemorrhage | FINRISK97     | 189       | 1.23      | 0.11      | 1.00–1.52     | 0.05               |
|                                              | DILGOM        | 101       | 1.39      | 0.14      | 1.05–1.83     | 0.02               |
|                                              | Meta-analysis | 290       | 1.29      | 0.09      | 1.09–1.52     | 0.003              |
| Chronic obstructive pulmonary disease        | FINRISK97     | 111       | 1.49      | 0.13      | 1.14–1.93     | 0.003              |
|                                              | DILGOM        | 44        | 1.57      | 0.20      | 1.05–2.35     | 0.03               |
|                                              | Meta-analysis | 155       | 1.51      | 0.11      | 1.21–1.89     | $2 \times 10^{-4}$ |
| Chronic kidney failure                       | FINRISK97     | 12        | 4.57      | 0.40      | 2.08–10.06    | $2 \times 10^{-4}$ |
|                                              | DILGOM        | 21        | 2.04      | 0.23      | 1.30–3.20     | 0.002              |
|                                              | Meta-analysis | 33        | 2.49      | 0.20      | 1.68–3.68     | $5 \times 10^{-6}$ |

**Table S5. Hazard ratio details for 12-year cardiovascular mortality risk in ANGES shown in Figure 2.** Hazard ratios indicate risk of cardiovascular mortality relative to individuals in the lowest GlycA quintile. There were 180 people in each quintile. 95% CI: 95% confidence interval. Cox proportional hazard models were adjusted with age, sex, albumin, VLDL-diameter, citrate, thrombocyte count and ejection fraction.

| <b>GlycA Quintile</b> | <b>Deaths</b> | <b>Hazard Ratio</b> | <b>Standard Error</b> | <b>95% CI</b> | <b>P-value</b>     |
|-----------------------|---------------|---------------------|-----------------------|---------------|--------------------|
| 20–40%                | 23            | 1.95                | 0.34                  | 1.00–3.80     | 0.05               |
| 40–60%                | 26            | 2.35                | 0.36                  | 1.16–4.77     | 0.02               |
| 60–80%                | 26            | 4.87                | 0.35                  | 2.45–9.65     | $6 \times 10^{-6}$ |
| 80–100%               | 41            | 5.00                | 0.38                  | 2.38–10.48    | $2 \times 10^{-5}$ |

**Table S6. CRP hazard ratio details for 12-year cardiovascular mortality risk in ANGES.** Hazard ratios indicate risk of cardiovascular mortality relative to individuals in the lowest CRP quintile. 95% CI: 95% confidence interval. Cox proportional hazard models were adjusted with age, sex, albumin, VLDL-diameter, citrate, thrombocyte count and ejection fraction. Analyses were conducted using 582 individuals with complete data.

| <b>CRP Quintile</b> | <b>Deaths</b> | <b>Hazard Ratio</b> | <b>Standard Error</b> | <b>95% CI</b> | <b>P-value</b>     |
|---------------------|---------------|---------------------|-----------------------|---------------|--------------------|
| 20–40%              | 23            | 1.77                | 0.43                  | 0.76–4.14     | 0.2                |
| 40–60%              | 26            | 3.41                | 0.37                  | 1.64–7.09     | 0.001              |
| 60–80%              | 26            | 3.13                | 0.38                  | 1.49–6.56     | 0.003              |
| 80–100%             | 41            | 4.62                | 0.35                  | 2.31–9.23     | $2 \times 10^{-5}$ |

**Table S7: Hazard ratios and standard errors for all outcomes analysed in the EHR analyses.** NB this table is provided as a separate Excel file. Hazard ratios and standard errors in each sensitivity analysis are provided as additional sheets in the Excel file.
